# Supplementary material for: Mendelian randomization study supports the causal effects of air pollution on longevity via multiple age-related diseases
Source: PubMed Central journal article supplement (PMC10730819; doi:10.1038/s41514-023-00126-0), 2023-12-19

## Supplementary Information

Supplementary Table 1. Information about instrumental variables.

| <b>SNP</b>  | <b>A1</b> | <b>A2</b> | <b>EAF</b> | <b>Beta</b> | <b>SE</b> | <b>P value</b> | <b>F statistic</b> |
|-------------|-----------|-----------|------------|-------------|-----------|----------------|--------------------|
| rs114708313 | T         | A         | 0.07       | 0.025       | 0.0045    | 4.2E-08        | 30.86              |
| rs12203592  | T         | C         | 0.21       | 0.022       | 0.0026    | 6.2E-17        | 71.6               |
| rs1372504   | A         | G         | 0.37       | 0.012       | 0.0022    | 3.1E-08        | 29.75              |
| rs1537371   | A         | C         | 0.5        | 0.012       | 0.0021    | 8.5E-09        | 32.65              |
| rs6749467   | A         | G         | 0.47       | -0.012      | 0.0022    | 1.4E-08        | 29.75              |
| rs72642437  | T         | C         | 0.004      | 0.113       | 0.0191    | 3.1E-09        | 35                 |
| rs77205736  | T         | C         | 0.27       | 0.014       | 0.0024    | 2.1E-08        | 34.03              |
| rs77255816  | T         | C         | 0.04       | 0.031       | 0.0057    | 4.2E-08        | 29.58              |

Supplementary Table 2. Univariate MR analysis of the causal effect of genetically determined PM2.5 concentration on longevity.

| <b>Exposure</b> | <b>Outcome</b>           | <b>Method</b>   | <b>No. SNPs</b> | <b>OR (95%CI)</b>  | <b>P value</b> |
|-----------------|--------------------------|-----------------|-----------------|--------------------|----------------|
| PM2.5           | 90th survival percentile | IVW             | 8               | 0.56 (0.12-2.63)   | 0.47           |
|                 |                          | Weighted median | 8               | 1.06 (0.29-3.83)   | 0.93           |
|                 |                          | MR Egger        | 8               | 2.09 (0.21-20.59)  | 0.55           |
|                 |                          | MR-PRESSO       | 6               | 0.37 (0.08-1.66)   | 0.25           |
| PM2.5           | 99th survival percentile | IVW             | 8               | 0.32 (0.03-3.61)   | 0.36           |
|                 |                          | Weighted median | 8               | 1.21 (0.15-9.56)   | 0.86           |
|                 |                          | MR Egger        | 8               | 2.18 (0.03-161.51) | 0.73           |
|                 |                          | MR-PRESSO       | 7               | 0.82 (0.22-3.09)   | 0.78           |

Supplementary Table 3. Univariate MR analysis of the causal effect of genetically determined PM2.5 concentration on potential mediators.

| Exposure        | Outcome         | Method          | SNP              | OR (95%CI)        | P value |
|-----------------|-----------------|-----------------|------------------|-------------------|---------|
| PM2.5           | BMI             | IVW             | 2                | 1.21 (0.39-3.81)  | 0.74    |
|                 |                 | WC              | 5                | 1.31 (0.90-1.90)  | 0.15    |
|                 |                 | Weighted median | 5                | 1.51 (1.05-2.19)  | 0.028   |
|                 | HC              | MR Egger        | 5                | 2.17 (0.24-19.50) | 0.54    |
|                 |                 | IVW             | 5                | 1.08 (0.77-1.52)  | 0.65    |
|                 |                 | Weighted median | 5                | 1.02 (0.69-1.51)  | 0.93    |
|                 | WHR             | MR Egger        | 5                | 1.46 (0.17-12.33) | 0.75    |
|                 |                 | IVW             | 5                | 1.25 (0.87-1.80)  | 0.22    |
|                 |                 | Weighted median | 5                | 1.36 (0.94-1.97)  | 0.11    |
|                 | T1D             | MR Egger        | 5                | 2.69 (0.33-21.69) | 0.42    |
|                 |                 | IVW             | 8                | 1.64 (0.48-5.67)  | 0.43    |
|                 |                 | Weighted median | 8                | 2.31 (0.45-11.93) | 0.32    |
|                 | T2D             | MR Egger        | 8                | 5.00 (0.34-74.59) | 0.29    |
|                 |                 | IVW             | 8                | 1.80 (0.89-3.64)  | 0.1     |
|                 |                 | Weighted median | 8                | 1.99 (1.22-3.25)  | 0.0058  |
|                 |                 | MR Egger        | 8                | 1.46 (0.35-6.11)  | 0.62    |
|                 | FI              | MR-PRESSO       | 6                | 1.86 (1.20-2.87)  | 0.039   |
|                 |                 | IVW             | 8                | 1.03 (0.92-1.16)  | 0.58    |
| Weighted median |                 | 8               | 1.00 (0.91-1.11) | 0.94              |         |
| FG              | MR Egger        | 8               | 0.99 (0.83-1.18) | 0.92              |         |
|                 | IVW             | 7               | 0.99 (0.91-1.07) | 0.73              |         |
|                 | Weighted median | 7               | 0.98 (0.89-1.07) | 0.6               |         |
| HbA1c           | MR Egger        | 7               | 0.99 (0.88-1.10) | 0.81              |         |
|                 | IVW             | 8               | 1.01 (0.91-1.11) | 0.92              |         |
|                 | Weighted median | 8               | 1.04 (0.96-1.13) | 0.31              |         |
|                 |                 | MR Egger        | 8                | 1.07 (0.92-1.24)  | 0.42    |

|                       |                 |   |                      |          |
|-----------------------|-----------------|---|----------------------|----------|
| LDL-C                 | IVW             | 8 | 0.99 (0.76-1.29)     | 0.96     |
|                       | Weighted median | 8 | 0.95 (0.81-1.11)     | 0.5      |
|                       | MR Egger        | 8 | 1.13 (0.57-2.24)     | 0.74     |
|                       | MR-PRESSO       | 5 | 1.03 (0.90-1.17)     | 0.7      |
| Hypercholesterolaemia | IVW             | 7 | 1.07 (1.01-1.15)     | 0.03     |
|                       | Weighted median | 7 | 1.05 (1.02-1.09)     | 0.0041   |
|                       | MR Egger        | 7 | 0.99 (0.80-1.24)     | 0.96     |
|                       | MR-PRESSO       | 6 | 1.04 (1.03-1.06)     | 0.0047   |
| SBP                   | IVW             | 7 | 0.10 (0.00-7.67)     | 0.3      |
|                       | Weighted median | 7 | 0.10 (0.01-1.42)     | 0.089    |
|                       | MR Egger        | 7 | 0.00 (0.00-11025.05) | 0.47     |
|                       | MR-PRESSO       | 5 | 0.03 (0.00-0.64)     | 0.088    |
| DBP                   | IVW             | 7 | 0.07 (0.02-0.27)     | 9.24E-05 |
|                       | Weighted median | 7 | 0.12 (0.03-0.50)     | 0.004    |
|                       | MR Egger        | 7 | 0.03 (0.00-3.26)     | 0.2      |
| Hypertension          | IVW             | 7 | 1.08 (1.02-1.16)     | 0.014    |
|                       | Weighted median | 7 | 1.08 (1.03-1.14)     | 0.0026   |
|                       | MR Egger        | 7 | 1.00 (0.80-1.24)     | 0.99     |
| CAD                   | IVW             | 8 | 1.99 (0.16-24.74)    | 0.59     |
|                       | Weighted median | 8 | 0.94 (0.71-1.23)     | 0.64     |
|                       | MR Egger        | 8 | 0.38 (0.01-16.30)    | 0.63     |
|                       | MR-PRESSO       | 3 | 1.56 (0.85-2.86)     | 0.29     |
| Angina pectoris       | IVW             | 5 | 1.05 (1.01-1.08)     | 0.0084   |
|                       | Weighted median | 5 | 1.03 (1.01-1.05)     | 0.000777 |
|                       | MR Egger        | 5 | 1.02 (0.87-1.20)     | 0.81     |
|                       | MR-PRESSO       | 4 | 1.03 (1.02-1.04)     | 0.0093   |
| HF                    | IVW             | 7 | 2.42 (0.67-8.75)     | 0.18     |
|                       | Weighted median | 7 | 1.15 (0.64-2.05)     | 0.64     |
|                       | MR Egger        | 7 | 0.86 (0.09-8.33)     | 0.9      |

|                          |                 |   |                     |        |
|--------------------------|-----------------|---|---------------------|--------|
| AF                       | IVW             | 8 | 1.30 (0.72-2.35)    | 0.39   |
|                          | Weighted median | 8 | 1.04 (0.65-1.64)    | 0.88   |
|                          | MR Egger        | 8 | 0.71 (0.27-1.90)    | 0.52   |
|                          | MR-PRESSO       | 6 | 1.06 (1.01-1.10)    | 0.046  |
| IHD                      | IVW             | 4 | 1.01 (0.99-1.04)    | 0.37   |
|                          | Weighted median | 4 | 1.01 (1.00-1.03)    | 0.05   |
|                          | MR Egger        | 4 | 1.13 (0.54-2.37)    | 0.78   |
|                          | MR-PRESSO       | 2 | 1.01 (1.01-1.02)    | 0.11   |
| Stroke                   | IVW             | 8 | 1.74 (0.62-4.93)    | 0.3    |
|                          | Weighted median | 8 | 1.20 (0.61-2.36)    | 0.6    |
|                          | MR Egger        | 8 | 0.45 (0.08-2.53)    | 0.4    |
| IS                       | IVW             | 8 | 1.16 (0.62-2.19)    | 0.64   |
|                          | Weighted median | 8 | 0.95 (0.69-1.30)    | 0.74   |
|                          | MR Egger        | 8 | 0.76 (0.36-1.61)    | 0.5    |
| Lung function (FVC)      | IVW             | 8 | 0.94 (0.79-1.11)    | 0.45   |
|                          | Weighted median | 8 | 1.02 (0.85-1.22)    | 0.86   |
|                          | MR Egger        | 8 | 0.92 (0.61-1.37)    | 0.69   |
| Lung function (FEV1/FVC) | IVW             | 8 | 0.91 (0.74-1.11)    | 0.36   |
|                          | Weighted median | 8 | 0.92 (0.76-1.12)    | 0.39   |
|                          | MR Egger        | 8 | 0.62 (0.44-0.86)    | 0.03   |
|                          |                 |   |                     |        |
| COPD                     | IVW             | 6 | 3.20 (0.63-16.19)   | 0.16   |
|                          | Weighted median | 6 | 5.95 (1.57-22.53)   | 0.0087 |
|                          | MR Egger        | 6 | 6.15 (0.02-2340.21) | 0.58   |
| Lung cancer              | IVW             | 7 | 0.43 (0.15-1.26)    | 0.12   |
|                          | Weighted median | 7 | 0.67 (0.25-1.83)    | 0.44   |
|                          | MR Egger        | 7 | 0.80 (0.17-3.84)    | 0.8    |
| Asthma                   | IVW             | 5 | 1.01 (1.00-1.02)    | 0.011  |
|                          | Weighted median | 5 | 1.01 (1.00-1.02)    | 0.15   |

---

|                |                 |   |                    |          |
|----------------|-----------------|---|--------------------|----------|
|                | MR Egger        | 5 | 1.06 (1.02-1.10)   | 0.063    |
| SLE            | IVW             | 7 | 0.45 (0.05-4.16)   | 0.48     |
|                | Weighted median | 7 | 2.40 (0.32-18.13)  | 0.4      |
|                | MR Egger        | 7 | 3.65 (0.21-64.47)  | 0.42     |
| RA             | IVW             | 8 | 0.78 (0.35-1.73)   | 0.54     |
|                | Weighted median | 8 | 0.93 (0.67-1.30)   | 0.68     |
|                | MR Egger        | 8 | 1.03 (0.36-2.94)   | 0.96     |
| CD             | Wald ratio      | 1 | 1.91 (0.27-13.71)  | 0.52     |
| UC             | IVW             | 7 | 0.59 (0.26-1.33)   | 0.21     |
|                | Weighted median | 7 | 0.82 (0.29-2.34)   | 0.71     |
|                | MR Egger        | 7 | 0.47 (0.11-1.98)   | 0.35     |
| MS             | IVW             | 6 | 2.21 (0.58-8.36)   | 0.24     |
|                | Weighted median | 6 | 1.03 (0.19-5.66)   | 0.98     |
|                | MR Egger        | 6 | 0.26 (0.00-17.79)  | 0.57     |
| Hypothyroidism | IVW             | 7 | 1.10 (1.06-1.13)   | 2.93E-08 |
|                | Weighted median | 7 | 1.10 (1.06-1.14)   | 1.09E-06 |
|                | MR Egger        | 7 | 1.12 (1.00-1.25)   | 0.12     |
| AD             | IVW             | 8 | 1.62 (1.01-2.60)   | 0.044    |
|                | Weighted median | 8 | 1.49 (0.82-2.69)   | 0.19     |
|                | MR Egger        | 8 | 1.83 (0.74-4.49)   | 0.24     |
| PD             | IVW             | 8 | 0.90 (0.23-3.45)   | 0.88     |
|                | Weighted median | 8 | 1.51 (0.39-5.95)   | 0.55     |
|                | MR Egger        | 8 | 4.92 (0.21-114.42) | 0.35     |
| ALS            | IVW             | 8 | 1.23 (0.89-1.72)   | 0.22     |
|                | Weighted median | 8 | 1.89 (1.20-2.96)   | 0.0056   |
|                | MR Egger        | 8 | 1.78 (0.96-3.31)   | 0.077    |
| LBD            | IVW             | 6 | 1.51 (0.15-15.09)  | 0.73     |
|                | Weighted median | 6 | 1.08 (0.05-22.41)  | 0.96     |
|                | MR Egger        | 6 | 0.00 (0.00-8.70)   | 0.23     |

---

Supplementary Table 4. Causal effects of genetically determined PM2.5 concentration, cigarettes smoked per day, nitrogen oxides air pollution and nitrogen dioxide air pollution on DBP using multivariable MR analysis.

| <b>Exposure</b>                | <b>Outcome</b> | <b>No. SNPs</b> | <b>beta</b> | <b>se</b> | <b>P value</b> |
|--------------------------------|----------------|-----------------|-------------|-----------|----------------|
| PM2.5                          | DBP            | 7               | 0.226       | 0.575     | 0.694          |
| Cigarettes smoked per day      |                | 22              | 0.001       | 0.020     | 0.980          |
| Nitrogen oxides air pollution  |                | 6               | 0.589       | 1.090     | 0.589          |
| Nitrogen dioxide air pollution |                | 7               | -1.033      | 0.871     | 0.236          |

Supplementary Table 5. Causal effects of genetically determined PM2.5 concentration, cigarettes smoked per day, nitrogen oxides air pollution and nitrogen dioxide air pollution on angina pectoris using multivariable MR analysis.

| <b>Exposure</b>                | <b>Outcome</b>     | <b>No. SNPs</b> | <b>beta</b> | <b>se</b> | <b>P value</b> |
|--------------------------------|--------------------|-----------------|-------------|-----------|----------------|
| PM2.5                          | Angina<br>pectoris | 5               | 0.127       | 0.039     | 0.0012         |
| Cigarettes smoked per day      |                    | 20              | -0.001      | 0.001     | 0.50           |
| Nitrogen oxides air pollution  |                    | 6               | -0.080      | 0.075     | 0.29           |
| Nitrogen dioxide air pollution |                    | 5               | -0.028      | 0.061     | 0.65           |



Supplementary Table 6. Causal effects of genetically determined PM2.5 concentration, cigarettes smoked per day, nitrogen oxides air pollution and nitrogen dioxide air pollution on hypercholesterolaemia using multivariable MR analysis.

| <b>Exposure</b>                | <b>Outcome</b>        | <b>No. SNPs</b> | <b>beta</b> | <b>se</b> | <b>P value</b> |
|--------------------------------|-----------------------|-----------------|-------------|-----------|----------------|
| PM2.5                          | Hypercholesterolaemia | 6               | 0.357       | 0.078     | 5.09E-06       |
| Cigarettes smoked per day      |                       | 22              | 0.006       | 0.003     | 0.018          |
| Nitrogen oxides air pollution  |                       | 6               | -0.364      | 0.145     | 0.012          |
| Nitrogen dioxide air pollution |                       | 7               | 0.024       | 0.115     | 0.83           |

Supplementary Table 7. Causal effects of genetically determined PM2.5 concentration, cigarettes smoked per day, nitrogen oxides air pollution and nitrogen dioxide air pollution on hypertension using multivariable MR analysis.

| <b>Exposure</b>                | <b>Outcome</b> | <b>No. SNPs</b> | <b>beta</b> | <b>se</b> | <b>P value</b> |
|--------------------------------|----------------|-----------------|-------------|-----------|----------------|
| PM2.5                          | hypertension   | 5               | 0.0211      | 0.0242    | 0.38           |
| Cigarettes smoked per day      |                | 17              | -0.000511   | 0.000778  | 0.51           |
| Nitrogen oxides air pollution  |                | 5               | -0.0359     | 0.0435    | 0.41           |
| Nitrogen dioxide air pollution |                | 3               | 0.0161      | 0.0377    | 0.67           |

Supplementary Table 8. Causal effects of genetically determined PM2.5 concentration, cigarettes smoked per day, nitrogen oxides air pollution and nitrogen dioxide air pollution on hypothyroidism using multivariable MR analysis.

| <b>Exposure</b>                | <b>Outcome</b> | <b>No. SNPs</b> | <b>beta</b> | <b>se</b> | <b>P value</b> |
|--------------------------------|----------------|-----------------|-------------|-----------|----------------|
| PM2.5                          | hypothyroidism | 6               | 0.117       | 0.046     | 0.012          |
| Cigarettes smoked per day      |                | 21              | 0.00261     | 0.002     | 0.104          |
| Nitrogen oxides air pollution  |                | 6               | -0.223      | 0.090     | 0.013          |
| Nitrogen dioxide air pollution |                | 6               | 0.117       | 0.073     | 0.108          |

Supplementary Table 9. Causal effects of genetically determined PM2.5 concentration, cigarettes smoked per day, nitrogen oxides air pollution and nitrogen dioxide air pollution on AD using multivariable MR analysis.

| <b>Exposure</b>                | <b>Outcome</b> | <b>No. SNPs</b> | <b>beta</b> | <b>se</b> | <b>P value</b> |
|--------------------------------|----------------|-----------------|-------------|-----------|----------------|
| PM2.5                          | AD             | 7               | -1.748      | 1.671     | 0.30           |
| Cigarettes smoked per day      |                | 22              | -0.036      | 0.060     | 0.55           |
| Nitrogen oxides air pollution  |                | 6               | -0.296      | 3.269     | 0.93           |
| Nitrogen dioxide air pollution |                | 7               | 2.546       | 2.667     | 0.34           |

Supplementary Table 10. Causal effects of genetically determined PM2.5 concentration, cigarettes smoked per day, nitrogen oxides air pollution and nitrogen dioxide air pollution on asthma using multivariable MR analysis.

| <b>Exposure</b>                | <b>Outcome</b> | <b>No. SNPs</b> | <b>beta</b> | <b>se</b> | <b>P value</b> |
|--------------------------------|----------------|-----------------|-------------|-----------|----------------|
| PM2.5                          | asthma         | 5               | 0.0190      | 0.0260    | 0.46           |
| Cigarettes smoked per day      |                | 17              | -0.0006     | 0.0008    | 0.43           |
| Nitrogen oxides air pollution  |                | 4               | 0.0192      | 0.0486    | 0.69           |
| Nitrogen dioxide air pollution |                | 3               | -0.0267     | 0.0398    | 0.50           |

Supplementary Table 11. Causal effects of genetically determined PM2.5 concentration, cigarettes smoked per day, nitrogen oxides air pollution and nitrogen dioxide air pollution on longevity (90th percentile) using multivariable MR analysis.

| <b>Exposure</b>                | <b>Outcome</b> | <b>No. SNPs</b> | <b>beta</b> | <b>se</b> | <b>P value</b> |
|--------------------------------|----------------|-----------------|-------------|-----------|----------------|
| PM2.5                          | longevity      | 6               | -0.854      | 3.017     | 0.78           |
| Cigarettes smoked per day      |                | 19              | -0.127      | 0.114     | 0.27           |
| Nitrogen oxides air pollution  |                | 6               | 3.732       | 6.119     | 0.54           |
| Nitrogen dioxide air pollution |                | 7               | -3.083      | 5.403     | 0.57           |

Supplementary Table 12. Causal effects of genetically determined PM2.5 concentration, cigarettes smoked per day, nitrogen oxides air pollution and nitrogen dioxide air pollution on longevity (99th percentile) using multivariable MR analysis.

| <b>Exposure</b>                | <b>Outcome</b> | <b>No. SNPs</b> | <b>beta</b> | <b>se</b> | <b>P value</b> |
|--------------------------------|----------------|-----------------|-------------|-----------|----------------|
| PM2.5                          | longevity      | 6               | -5.7137     | 4.695     | 0.22           |
| Cigarettes smoked per day      |                | 19              | -0.0001     | 0.170     | 0.99           |
| Nitrogen oxides air pollution  |                | 6               | 0.1423      | 9.235     | 0.99           |
| Nitrogen dioxide air pollution |                | 7               | 5.1526      | 8.118     | 0.53           |

Supplementary Table 13. MR analysis of the causal effect of genetically determined asthma on longevity (90th percentile).

| <b>Exposure</b> | <b>Outcome</b>  | <b>Method</b>   | <b>No. SNPs</b> | <b>OR (95%CI)</b> | <b>P value</b> |
|-----------------|-----------------|-----------------|-----------------|-------------------|----------------|
| asthma          | 90th percentile | IVW             | 95              | 1.55 (0.69-3.49)  | 0.29           |
|                 |                 | Weighted median | 95              | 1.48 (0.50-4.33)  | 0.48           |
|                 |                 | MR Egger        | 95              | 0.47 (0.06-3.68)  | 0.47           |



Supplementary Table 14. MR analysis of the causal effect of genetically determined asthma on longevity (99th percentile).

| <b>Exposure</b> | <b>Outcome</b>  | <b>Method</b>   | <b>No. SNPs</b> | <b>OR (95%CI)</b> | <b>P value</b> |
|-----------------|-----------------|-----------------|-----------------|-------------------|----------------|
| asthma          | 99th percentile | IVW             | 91              | 0.71 (0.22-2.34)  | 0.58           |
|                 |                 | Weighted median | 91              | 1.63 (0.29-9.10)  | 0.58           |
|                 |                 | MR Egger        | 91              | 1.02 (0.05-21.09) | 0.99           |

Supplementary Figure 1. Scatter plot about the causal effect of PM2.5 concentration on longevity. The x-axis shows the SNP effect and standard error on each of PM2.5 concentration SNPs. The y-axis shows the SNP effect and standard error on longevity.

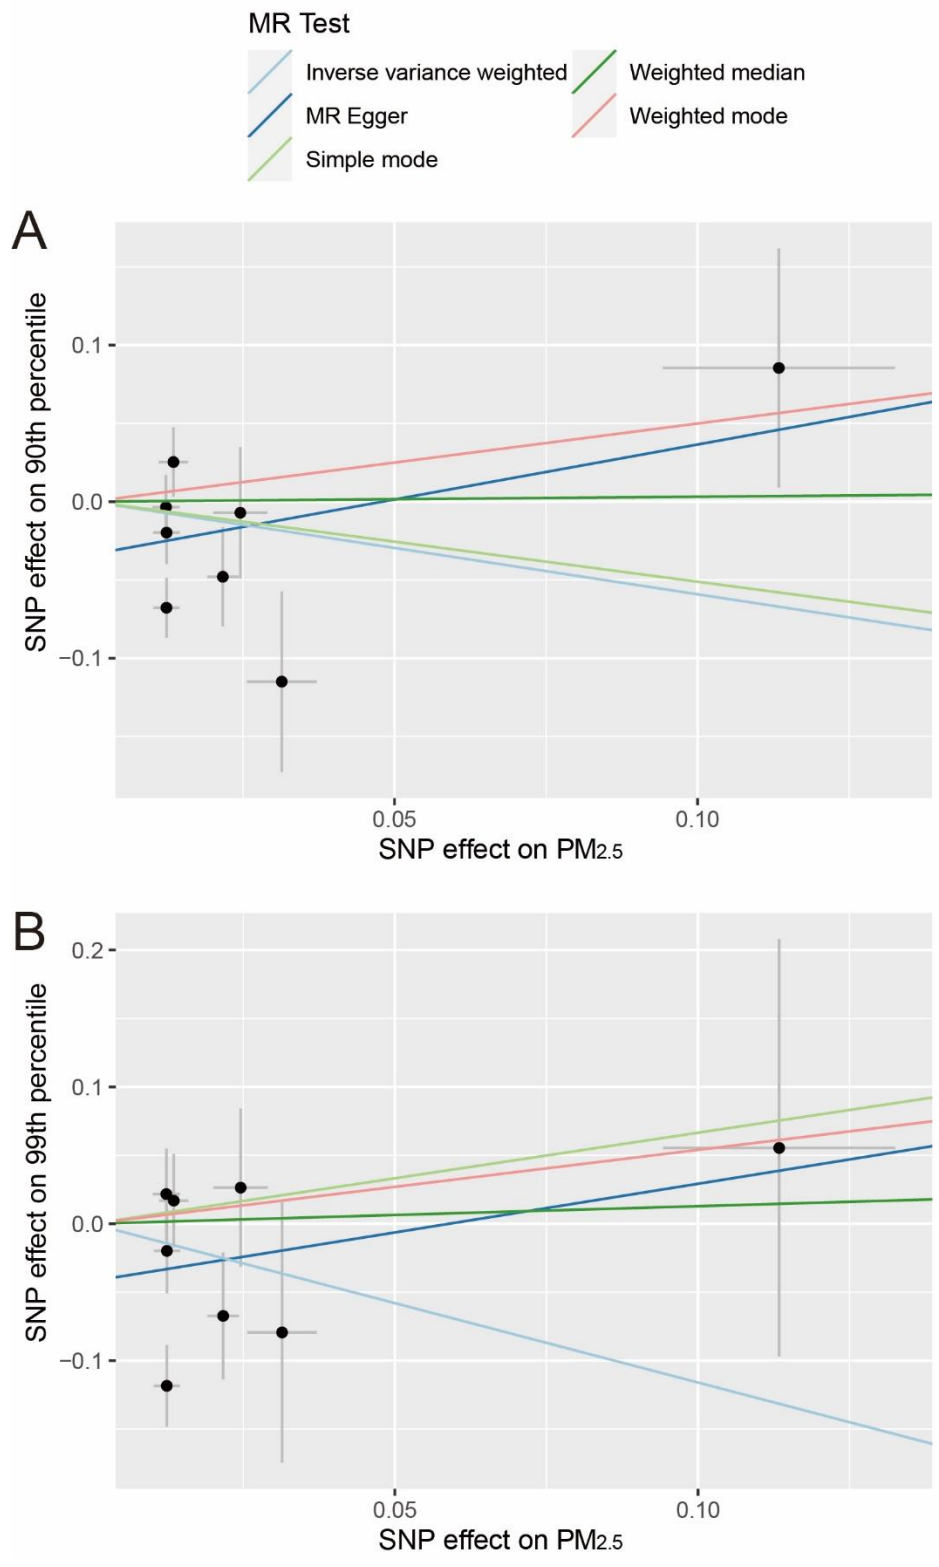

Supplement: 41514_2023_126_MOESM1_ESM.pdf [file 41514_2023_126_MOESM1_ESM.pdf]
